# Supplementary material for: Printed In-Ga-Zn-O drop-based thin-film transistors sintered using intensely pulsed white light
Source: Royal Society of Chemistry journal article supplement (doi:10.1039/c5ra13573g), 2015-01-01
Supplement: c5ra13573g1.pdf [file c5ra13573g1.pdf]

Supporting Information for

## Printed In-Ga-Zn-O drop-based thin-film transistors sintered using intensely pulsed white light

Wi Hyoung Lee<sup>1</sup>, Seong Jun Lee<sup>2</sup>, Jung Ah Lim<sup>3\*</sup>, Jeong Ho Cho<sup>2\*</sup>

<sup>1</sup>Department of Organic and Nano System Engineering, Konkuk University, Seoul 143-701, Korea

<sup>2</sup>SKKU Advanced Institute of Nanotechnology (SAINT) and School of Chemical Engineering, Sungkyunkwan University, Suwon 440-746, Korea

<sup>3</sup>Center for Opto-Electronic Materials and Devices, Post-Silicon Semiconductor Institute, Korea Institute of Science and Technology, Seoul 136-791, Korea

\*E-mail: [jalim@kist.re.kr](mailto:jalim@kist.re.kr) and [jhcho94@skku.edu](mailto:jhcho94@skku.edu)

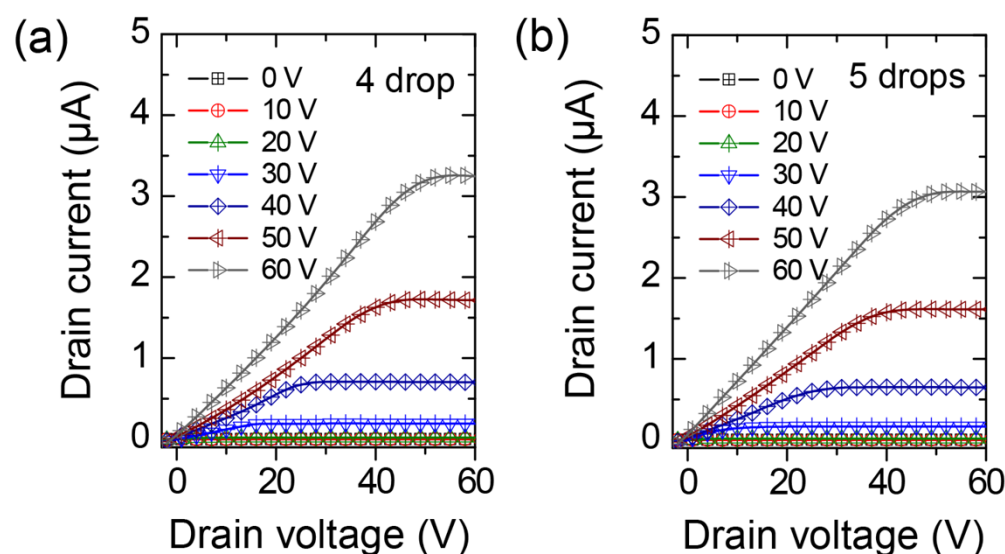

**Figure S1.** Output characteristics of IGZO TFTs with 4 drops (a) and 5 drops (b).
